# Supplementary material for: Recurring patterns in tone (chain) shift
Source: publisher site journal article supplement (doi:10.1515/lingvan-2024-0028), 2025-05-22
Supplement: Supplementary file 1 [file j_lingvan-2024-0028_suppl_002.xlsx]

## Sheet: Changes
DoculectID	Language	Study	Language Family	Reported change(s)	Begin state	Change type	Chain shift?	Rightward sliding	Contour reduction	Onset toward mid	Falls rise; Rises lower	Level tones toward mid	Interaction with other factors	Unpredicted direction	Sample size	Study Type	Chain shift type	Chain shift order	Tone Inventory	Tone Domain	Dataset
1	Balihan	Xue 2013	Sinitic	2a 35 > 214	mid rising	simple shift	n	y	n	n	y	na	n	n	60	generational differences, lacking rigorous statistical analysis				syllable	Yang & Xu (2019)
2	Bangkok Thai early 20th	Pittayaporn 2018	Kradai	raising of T3 to high falling	mid falling	chain shift	y	n	n	n	y	na	n	n	NA	comparing acoustic results from different time periods				syllable	chain
2	Bangkok Thai early 20th	Pittayaporn 2018	Kradai	peak sliding of T4; rising-falling > rising	high rising-falling	chain shift	y	y	y	n	n	na	n	n	NA	comparing acoustic results from different time periods				syllable	chain
2	Bangkok Thai early 20th	Pittayaporn 2018	Kradai	A1/T5 rising > falling-rising	low rising	one of multiple, not claimed to form a chain	n	y	y	n	n	na	n	n	NA	comparing acoustic results from different time periods				syllable	Yang & Xu (2019)
2	Bangkok Thai early 21st	Zsiga 2008	Kradai	falling (T3) HL > H	high falling	one of multiple, not claimed to form a chain	n	maybe	y	n	n	na	n	n	10	generational differences with rigorous statistical analysis				syllable	Yang & Xu (2019)
2	Bangkok Thai early 21st	Zsiga 2008	Kradai	T5 (rising) LH > L(H)	low falling-rising	one of multiple, not claimed to form a chain	n	y	y	n	n	na	n	n	10	generational differences with rigorous statistical analysis				syllable	Yang & Xu (2019)
2	Bangkok Thai early 21st	Teeranon 2007	Kradai	T4 (high): high level > mid rising	high level	one of multiple, not claimed to form a chain	n	y	n	y	na	n	n	n	15	generational differences with rigorous statistical analysis				syllable	Yang & Xu (2019)
3	Batta Maˈya	Arnold (forthcoming)	Austronesian	1) proto-Salawati-Batta *High > Rising / *i, *u, and > Low / *e, *a, *o;	high?	chain shift	y	maybe	n	maybe	na	na	n	n	NA	micro-reconstruction	Claimed to be push:	1	3	word	chain
3	Batta Maˈya	Arnold (forthcoming)	Austronesian	2) pSB *ˈRising > High (mid level?)	mid?	chain shift	y	maybe	y	maybe	na	na	n	n	NA	micro-reconstruction	Claimed to be push:	2	3	word	chain
4	Beijing Mandarin early 20th	Chen (2018); Endo (2020)	Sinitic	1) T1 high falling > high level	high falling	chain shift	y	y	y	n	n	na	n	n	NA	comparing acoustic results from different time periods	claimed to be push	1	4	syllable	chain
4	Beijing Mandarin early 20th	Chen (2018); Endo (2020)	Sinitic	2) T4 mid falling > high falling	mid falling	chain shift	y	n	n	n	y	na	n	n	NA	comparing acoustic results from different time periods	claimed to be push	2	4	syllable	chain
4	Old Beijing Mandarin	Shi & Wang 2006	Sinitic	1a high level offset lowers	high level	one of multiple, not claimed to form a chain	n	n	n	n	na	n	n	high level offset lowers (!)	52	generational differences with rigorous statistical analysis				syllable	Yang & Xu (2019)
4	Old Beijing Mandarin	Shi & Wang 2006	Sinitic	1b mid rising onset raises	mid rising	one of multiple, not claimed to form a chain	n	y	n	y	n	na	n	n	52	generational differences with rigorous statistical analysis				syllable	Yang & Xu (2019)
4	Old Beijing Mandarin	Shi & Wang 2006	Sinitic	2ab fall-rise onset raises, dipping pivot point moves later	low falling-rising	one of multiple, not claimed to form a chain	n	y	n	y	n	na	n	n	52	generational differences with rigorous statistical analysis				syllable	Yang & Xu (2019)
4	Old Beijing Mandarin	Shi & Wang 2006	Sinitic	3ab high falling offset raises	high falling	one of multiple, not claimed to form a chain	n	n	y	n	n	na	n	n	52	generational differences with rigorous statistical analysis				syllable	Yang & Xu (2019)
5	Biga Maˈya	Arnold (forthcoming)	Austronesian	1) proto- Maˈya *Rise: low rising > High (mid level);	low rising	chain shift	y	maybe	y	maybe	n	na	n	n	NA	micro-reconstruction	Claimed to be push:	1	2	word	chain
5	Biga Maˈya	Arnold (forthcoming)	Austronesian	2) proto- Maˈya *High: mid level > Extra High	mid level	chain shift	y	n	n	n	na	n	n	overall raising of high (!)	NA	micro-reconstruction	Claimed to be push:	2	2	word	chain
6	Bunu	Gong 2018	Hmong-Mien	T2 low rise onset raises	low rising	one of multiple, not claimed to form a chain	n	maybe	maybe	y	n	na	n	n	12	generational differences with rigorous statistical analysis				syllable	Yang & Xu (2019)
6	Bunu	Gong 2018	Hmong-Mien	T4 mid rise-fall onset raises	mid rising-falling	one of multiple, not claimed to form a chain	n	maybe	maybe	y	n	na	n	n	12	generational differences with rigorous statistical analysis				syllable	Yang & Xu (2019)
7	Changsha Xiang	Xiang & Shi 2007	Sinitic	1b 13 > offset lowers	low rising	one of multiple, not claimed to form a chain	n	maybe	y	n	n	na	n	n	67	generational differences, lacking rigorous statistical analysis				syllable	Yang & Xu (2019)
7	Changsha Xiang	Xiang & Shi 2007	Sinitic	3ab 42 offset raises	midhigh falling	one of multiple, not claimed to form a chain	n	y	y	n	n	na	n	n	67	generational differences, lacking rigorous statistical analysis				syllable	Yang & Xu (2019)
8	Chaohu	Xing 2008	Sinitic	3ab 52/54 > 55	high falling	simple shift	n	y	y	n	n	na	n	n	10	generational differences, lacking rigorous statistical analysis				syllable	Yang & Xu (2019)
9	Chongqing Mandarin	Ming & Zhang 2015	Sinitic	3ab 24 > 213	low rising	one of multiple, not claimed to form a chain	n	y	y	n	y	na	n	n	10	generational differences, lacking rigorous statistical analysis				syllable	Yang & Xu (2019)
9	Chongqing Mandarin	Ming & Zhang 2015	Sinitic	2b 21 > 31	low falling	one of multiple, not claimed to form a chain	n	n	n	y	y	na	n	n	10	generational differences, lacking rigorous statistical analysis				syllable	Yang & Xu (2019)
9	Chongqing Mandarin	Liang & Meng 2011	Sinitic	T1 high rising onset lowers; “rise” feature is more remarkable;	high rising	one of multiple, not claimed to form a chain	n	y	n	y	n	na	n	n	30	generational differences with rigorous statistical analysis				syllable	Yang & Xu (2019)
9	Chongqing Mandarin	Liang & Meng 2011	Sinitic	T3 high falling onset lowers, “convex” shape is forming	high falling	one of multiple, not claimed to form a chain	n	y	n	y	n	na	n	n	30	generational differences with rigorous statistical analysis				syllable	Yang & Xu (2019)
10	Dali Nisu	Yang & Yang 2018	Tibeto-Burman	13> 22	low rising	one of multiple, not claimed to form a chain	n	maybe	y	y	n	na	n	n	26	generational differences with rigorous statistical analysis				syllable	Yang & Xu (2019)
10	Dali Nisu	Yang & Yang 2018	Tibeto-Burman	55 > 44	high level	one of multiple, not claimed to form a chain	n	n	n	n	na	y	n	n	26	generational differences with rigorous statistical analysis				syllable	Yang & Xu (2019)
11	Dalian Mandarin	Gao 2018	Sinitic	high falling > high level	high falling	simple shift	n	n	y	n	n	na	n	n	106	generational differences with rigorous statistical analysis				syllable	Yang & Xu (2019)
12	Dong’gan	Liu 2013b	Sinitic	1a 21 > 31	low falling	one of multiple, not claimed to form a chain	n	n	n	y	y	na	n	n	7	generational differences, lacking rigorous statistical analysis				syllable	Yang & Xu (2019)
12	Dong’gan	Liu 2013b	Sinitic	1b 34 > 24	mid rising	one of multiple, not claimed to form a chain	n	n	n	n	y	na	n	n	7	generational differences, lacking rigorous statistical analysis				syllable	Yang & Xu (2019)
12	Dong’gan	Liu 2013b	Sinitic	3ab 55/44 > 54	high level	one of multiple, not claimed to form a chain	n	n	n	n	na	n	n	high falling offset lowers (!)	7	generational differences, lacking rigorous statistical analysis				syllable	Yang & Xu (2019)
13	Duyun	Li 2010	Sinitic	merger of 4ab with 1b: 42short > 53 modal*	midhigh falling	merger	n	n	n	n	y	na	n	n	160	generational differences, lacking rigorous statistical analysis				syllable	Yang & Xu (2019)
14	Ezhou Mandarin	Kenstowicz and Yu (2022)	Sinitic	1) T5 mid-high level > low rising	midhigh level	chain shift	y	y	n	y	na	n	n	n	NA	comparing acoustic results from different time periods	claimed to be push	1	6	syllable	chain
14	Ezhou Mandarin	Kenstowicz and Yu (2022)	Sinitic	2) T1 low rising > low level	low rising	chain shift	y	y	y	n	n	na	n	n	NA	comparing acoustic results from different time periods	claimed to be push	2	6	syllable	chain
15	Gaotian Zhuang	Zeng 2001	Kradai	T1 42 (& T3 53) > 52	mid falling	merger	n	n	n	n	y	na	n	n	NA	comparing acoustic results from different time periods				syllable	Yang & Xu (2019)
15	Gaotian Zhuang	Zeng 2001	Kradai	(T1 42 & ) T3 53 > 52	high falling	merger	n	n	n	n	n	na	merger	high falling offset lowers (!)	NA	comparing acoustic results from different time periods				syllable	Yang & Xu (2019)
15	Gaotian Zhuang	Zeng 2001	Kradai	T4 35 (& T6 213) > 224	mid rising	merger	n	y	n	n	y	na	n	n	NA	comparing acoustic results from different time periods				syllable	Yang & Xu (2019)
15	Gaotian Zhuang	Zeng 2001	Kradai	(T4 35 &) T6 213 > 224	low falling-rising	merger	n	maybe	y	n	n	na	n	n	NA	comparing acoustic results from different time periods				syllable	Yang & Xu (2019)
16	Guangzhou Cantonese	Ou 2012	Sinitic	T6 (low level) moves up to T3, merged tone is mid-level*	low level	merger	n	n	n	n	na	y	n	n	75	generational differences with rigorous statistical analysis				syllable	Yang & Xu (2019)
17	Guienagati Zapotec	Benn (2021)	Otomanguean	T21 low falling > mid falling	low falling	chain shift	y	n	n	y	y	na	n	n	NA	micro-reconstruction	No claim regarding sequence:	na	3	root	chain
17	Guienagati Zapotec	Benn (2021)	Otomanguean	T42 high falling > high level	high falling	chain shift	y	y	y	n	n	na	n	n	NA	micro-reconstruction	No claim regarding sequence:	na	3	root	chain
17	Guienagati Zapotec	Benn (2021)	Otomanguean	T24 mid rising > less rise	mid rising	chain shift	y	y	y	n	n	na	n	n	NA	micro-reconstruction	No claim regarding sequence:	na	3	root	chain
18	Hai-Lu Hakka	Yeh & Lin 2015	Sinitic	low-level tone > low-falling tone	low level	simple shift	n	n	n	y	na	n	n	n	32	generational differences with rigorous statistical analysis				syllable	Yang & Xu (2019)
19	Hong Kong Cantonese	Zhang, Zhang, & Xu 2018	Sinitic	Tone 9 low level moves up to merge with Tone 8*	low level	merger	n	n	n	n	na	y	n	n	50	generational differences with rigorous statistical analysis				syllable	Yang & Xu (2019)
19	Hong Kong Cantonese	Zhang 2019	Sinitic	T2 25 > 24 offset lowers, moving toward merger with T5 23*; T6 low level raises overall, moving toward merger with T3 mid level*	mid rising	merger	n	n	y	n	n	na	n	n	50	generational differences with rigorous statistical analysis				syllable	non-chain shift
20	Iu Mien	L-Thongkum 1997	Hmong-Mien	T4 232 merge to 34*	low rising-falling	merger	n	y	y	n	n	na	n	n	19	generational differences, lacking rigorous statistical analysis				syllable	Yang & Xu (2019)
20	Iu Mien	L-Thongkum 1997	Hmong-Mien	T3 453 > 45	high rising-falling	one of multiple, not claimed to form a chain	n	y	y	n	n	na	n	n	19	generational differences, lacking rigorous statistical analysis				syllable	Yang & Xu (2019)
21	Jiangying Wu	Liu 2013a	Sinitic	3a merge to 1a 434 > 41*	high falling-rising	merger	n	y	y	n	n	na	n	n	NA	comparing acoustic results from different time periods				syllable	Yang & Xu (2019)
21	Jiangying Wu	Liu 2013a	Sinitic	4a 31s > 5	mid falling short	one of multiple, not claimed to form a chain	n	y	y	n	y	na	n	n	NA	comparing acoustic results from different time periods				syllable	Yang & Xu (2019)
22	Jinhua Wu sandhi tones	Carroll (2010a; 2010b)	Sinitic	high > rising > low > falling > high	high level	chain shift	y	y	n	y	na	n	n	n	20	generational differences with rigorous statistical analysis	No claim regarding sequence:	na	5	syllable	chain
22	Jinhua Wu sandhi tones	Carroll (2010a; 2010b)	Sinitic	high > rising > low > falling > high	mid rising	chain shift	y	n	n	n	y	na	n	n	20	generational differences with rigorous statistical analysis	No claim regarding sequence:	na	5	syllable	chain
22	Jinhua Wu sandhi tones	Carroll (2010a; 2010b)	Sinitic	high > rising > low > falling > high	low level	chain shift	y	n	n	y	na	n	n	n	20	generational differences with rigorous statistical analysis	No claim regarding sequence:	na	5	syllable	chain
22	Jinhua Wu sandhi tones	Carroll (2010a; 2010b)	Sinitic	high > rising > low > falling > high	mid falling	chain shift	y	n	n	n	y	na	n	n	20	generational differences with rigorous statistical analysis	No claim regarding sequence:	na	5	syllable	chain
23	Jining Jin	Wang (2006), Liang (2023)	Sinitic	ping mid falling > high falling	mid falling	chain shift	y	n	n	n	y	na	n	n	5	generational differences, lacking rigorous statistical analysis	No claim regarding sequence:	na	4	syllable	chain
23	Jining Jin	Wang (2006), Liang (2023)	Sinitic	shang high falling excursion decreases	high falling	chain shift	y	y	y	n	n	na	n	n	5	generational differences, lacking rigorous statistical analysis	No claim regarding sequence:	na	4	syllable	chain
23	Jining Jin	Wang 2006	Sinitic	qu (3ab) 232 > 24	low rising-falling	one of multiple, not claimed to form a chain	n	y	n	n	n	na	n	n	5	generational differences, lacking rigorous statistical analysis				syllable	Yang & Xu (2019)
23	Jining Jin	Wang 2006	Sinitic	4ab 42s > 52s	mid falling short	one of multiple, not claimed to form a chain	n	n	n	n	y	na	n	n	5	generational differences, lacking rigorous statistical analysis				syllable	Yang & Xu (2019)
24	Jiyang	Liu 2017	Sinitic	1a 23 > 213	low rising	simple shift	n	y	n	n	y	na	n	n	30	generational differences, lacking rigorous statistical analysis				syllable	Yang & Xu (2019)
25	Keng Tung Shan	Owen 2012	Kradai	A123 24 > 214	low rising	one of multiple, not claimed to form a chain	n	y	n	n	y	na	n	n	NA	comparing acoustic results from different time periods				syllable	Yang & Xu (2019)
25	Keng Tung Shan	Owen 2012	Kradai	B123 11 > 31	low level	one of multiple, not claimed to form a chain	n	n	n	y	na	n	n	n	NA	comparing acoustic results from different time periods				syllable	Yang & Xu (2019)
26	Khuen Thai (Kang Murng 5 tone system)	Owen 2012	Kradai	B123 13 > merge to B4 22*	low rising	merger	n	maybe	y	maybe	n	na	n	n	NA	comparing acoustic results from different time periods				syllable	Yang & Xu (2019)
26	Khuen Thai (Kang Murng 5 tone system)	Owen 2012	Kradai	A12 15 > 325	low rising	one of multiple, not claimed to form a chain	n	y	y	y	n	na	n	n	NA	comparing acoustic results from different time periods				syllable	Yang & Xu (2019)
27	Khuen Thai (Murng Lang 6 tone system)	Owen 2012	Kradai	A12 35 > 215	mid rising	simple shift	n	y	n	n	y	na	n	n	NA	comparing acoustic results from different time periods				syllable	Yang & Xu (2019)
28	Kouzhai Dong	Zhang, Wei, & Wang 2016	Kradai	T1 55> 45	high level	one of multiple, not claimed to form a chain	n	n	n	y	na	n	n	n	NA	comparing acoustic results from different time periods				syllable	Yang & Xu (2019)
28	Kouzhai Dong	Zhang, Wei, & Wang 2016	Kradai	T9 24 > 323	low rising	one of multiple, not claimed to form a chain	n	y	y	y	n	na	n	n	NA	comparing acoustic results from different time periods				syllable	Yang & Xu (2019)
29	Lanzhou Mandarin	Zhang 2012	Sinitic	2ab/3ab merger 232 > 13*	low rising-falling	merger	n	y	n	n	y	na	n	n	30	generational differences, lacking rigorous statistical analysis				syllable	Yang & Xu (2019)
29	Lanzhou Mandarin	Yi 2017	Sinitic	1a high falling > high level	high falling	one of multiple, not claimed to form a chain	n	n	y	n	n	na	n	n	36	generational differences with rigorous statistical analysis				syllable	Yang & Xu (2019)
30	Lipo Mandarin	Zeng 2005	Sinitic	2ab 55 > 45	high level	one of multiple, not claimed to form a chain	n	n	n	y	na	n	n	n	17	generational differences with rigorous statistical analysis				syllable	Yang & Xu (2019)
30	Lipo Mandarin	Zeng 2005	Sinitic	3ab 113 >213	low rising	one of multiple, not claimed to form a chain	n	n	n	y	n	na	n	n	17	generational differences with rigorous statistical analysis				syllable	Yang & Xu (2019)
30	Lipo Mandarin	Zeng 2005	Sinitic	3ab 213 > 21	low falling-rising	one of multiple, not claimed to form a chain	n	y	y	n	n	na	n	n	17	generational differences with rigorous statistical analysis				syllable	Yang & Xu (2019)
31	Mak	Wang 2004	Kradai	T1 13 > 312	low rising	one of multiple, not claimed to form a chain	n	y	y	y	n	na	n	n	NA	comparing acoustic results from different time periods				syllable	Yang & Xu (2019)
31	Mak	Wang 2004	Kradai	T6 224 > 33	low rising	one of multiple, not claimed to form a chain	n	y	y	y	n	na	n	n	NA	comparing acoustic results from different time periods				syllable	Yang & Xu (2019)
31	Mak	Wang 2004	Kradai	T7 35 short > 44/55	mid rising	one of multiple, not claimed to form a chain	n	y	y	n	n	na	n	n	NA	comparing acoustic results from different time periods				syllable	Yang & Xu (2019)
32	Miancheng Chaoshan Min	Zhang (2020)	Sinitic	1) T2a high level > mid rising	high level	chain shift	y	y	n	y	na	n	n	n	13	generational differences, lacking rigorous statistical analysis	Claimed to be pull:	1	5	syllable	chain
32	Miancheng Chaoshan Min	Zhang (2020)	Sinitic	2) T3b mid-high falling > mid-high level	midhigh falling	chain shift	y	maybe	y	n	n	na	n	n	13	generational differences, lacking rigorous statistical analysis	Claimed to be pull:	2	5	syllable	chain
32	Miancheng Chaoshan Min	Zhang (2020)	Sinitic	3) T1a low falling > mid falling	low falling	chain shift	y	n	n	n	y	na	n	n	13	generational differences, lacking rigorous statistical analysis	Claimed to be pull:	3	5	syllable	chain
33	Misool Maˈya	Remijsen (2001a; 2001b)	Austronesian	1) Rise: low rising > low falling;	low rising	chain shift	y	y	y	maybe	n	na	n	n	NA	micro-reconstruction	Claimed to be push:	1	3	word	chain
33	Misool Maˈya	Remijsen (2001a; 2001b)	Austronesian	2) Fall: low falling > high falling	low falling	chain shift	y	n	n	y	y	na	n	n	NA	micro-reconstruction	Claimed to be push:	2	3	word	chain
34	Nanchang Gan	Cui 2010	Sinitic	2 > 5; Ru tonal merger: [5] and [2] merging to [5]*	low level	merger	n	n	n	n	na	n	raising to high in checked syllables	n	40	generational differences with rigorous statistical analysis				syllable	Yang & Xu (2019)
35	Nancheng	Zhang 2015	Sinitic	3b 24 merger to 3a 32*	low rising	merger	n	y	y	y	maybe	na	n	n	50	generational differences, lacking rigorous statistical analysis				syllable	Yang & Xu (2019)
36	Penang Hokkien	Hing 2018	Sinitic	53 > 453 > 445	high falling	simple shift	n	y	y	y	n	na	n	n	12	generational differences, lacking rigorous statistical analysis				syllable	Yang & Xu (2019)
37	Qingyun Lalo	Yang et al. 2015	Tibeto-Burman	high level splits to mid rising after voiced initials and high level elsewhere*	high level	split	n	y	n	y	na	n	y	n	38	generational differences with rigorous statistical analysis				syllable	Yang & Xu (2019)
38	Shanghai dialects BSD and SJD	Zhang 2014	Sinitic	rising T4/6 and Wuxi T2/6 decreasing steepness	low rising	one of multiple, not claimed to form a chain	n	maybe	y	n	n	na	n	n	80	generational differences with rigorous statistical analysis				syllable	Yang & Xu (2019)
39	Shanghai dialects other	Zhang 2014	Sinitic	4 dialects show delayed rising 13 > 113;	low rising	one of multiple, not claimed to form a chain	n	y	n	n	n	na	n	n	80	generational differences with rigorous statistical analysis				syllable	Yang & Xu (2019)
40	Suzhou Wu	Bei 2011	Sinitic	3b 231 > 331	low rising-falling	one of multiple, not claimed to form a chain	n	n	n	y	n	na	n	n	57	generational differences, lacking rigorous statistical analysis				syllable	Yang & Xu (2019)
40	Suzhou Wu	Bei 2011	Sinitic	3a 512 offset lowers	high falling-rising	one of multiple, not claimed to form a chain	n	y	y	n	n	na	n	n	57	generational differences, lacking rigorous statistical analysis				syllable	Yang & Xu (2019)
40	Suzhou Wu	Bei 2011	Sinitic	4b 13>23	low rising	one of multiple, not claimed to form a chain	n	n	y	y	n	na	n	n	57	generational differences, lacking rigorous statistical analysis				syllable	Yang & Xu (2019)
40	Suzhou Wu	Ge et al. 2023	Sinitic	T2 low rising > falling-rising	low rising	one of multiple, not claimed to form a chain	n	y	maybe	y	n	na	n	n	36	generational differences with rigorous statistical analysis				syllable	non-chain shift
40	Suzhou Wu	Ge et al. 2023	Sinitic	T8 low rising checked : rise is shifting later	low rising	one of multiple, not claimed to form a chain	n	y	maybe	y	n	na	n	n	36	generational differences with rigorous statistical analysis				syllable	non-chain shift
41	Tai Phuan	Akharawatthanakun 2010	Kradai	A1 23 > 21	low rising	chain shift?	n	y	y	maybe	n	na	n	n	15	generational differences, lacking rigorous statistical analysis				syllable	Yang & Xu (2019)
41	Tai Phuan	Akharawatthanakun 2010	Kradai	Mid-rising > Low-rising	mid rising	chain shift?	n	n	n	n	y	na	n	n	15	generational differences, lacking rigorous statistical analysis				syllable	Yang & Xu (2019)
42	Taipusi	Wei & Cao 2010	Sinitic	3ab 213 > 211	low falling-rising	one of multiple, not claimed to form a chain	n	y	y	n	n	na	n	n	8	generational differences, lacking rigorous statistical analysis				syllable	Yang & Xu (2019)
42	Taipusi	Wei & Cao 2010	Sinitic	4ab 211 > 421	low falling	one of multiple, not claimed to form a chain	n	n	n	y	y	na	n	n	8	generational differences, lacking rigorous statistical analysis				syllable	Yang & Xu (2019)
43	Taiwan Mandarin	Sanders 2008	Sinitic	T2: 35 > 325, rising to dipping	mid rising	chain shift	y	y	n	n	y	na	n	n	33	generational differences with rigorous statistical analysis	claimed to be push	1	4	syllable	chain
43	Taiwan Mandarin	Sanders 2008	Sinitic	T3 213 > 21, dipping to falling	low falling-rising	chain shift	y	y	y	n	n	na	n	n	33	generational differences with rigorous statistical analysis	claimed to be push	2	4	syllable	chain
44	Taiwanese Min	Chiung 2003	Sinitic	T2: 12 > 212, low rising to falling-rising	low rising	simple shift	n	y	maybe	y	n	na	n	n	30	generational differences with rigorous statistical analysis				syllable	Yang & Xu (2019)
45	Thai Song Dam (Nakhonpathom)	Burusphat, S. 2011	Kradai	A123 13 > 213	low rising	one of multiple, not claimed to form a chain	n	y	n	y	n	na	n	n	6	generational differences, lacking rigorous statistical analysis				syllable	Yang & Xu (2019)
45	Thai Song Dam (Nakhonpathom)	Burusphat, S. 2011	Kradai	B123 24 > 214	low rising	one of multiple, not claimed to form a chain	n	y	n	n	y	na	n	n	6	generational differences, lacking rigorous statistical analysis				syllable	Yang & Xu (2019)
45	Thai Song Dam (Nakhonpathom)	Burusphat, S. 2011	Kradai	A4 243 > 232	low rising-falling	one of multiple, not claimed to form a chain	n	n	y	n	y	na	n	n	6	generational differences, lacking rigorous statistical analysis				syllable	Yang & Xu (2019)
46	W. Lalo	Yang (2022)	Tibeto-Burman	TL low falling > high falling;	low falling	chain shift	y	n	n	y	y	na	n	n	NA	micro-reconstruction	No claim regarding sequence:	na	4	syllable	chain
46	W. Lalo	Yang (2022)	Tibeto-Burman	T1 high level > mid-high level	high level	chain shift	y	n	n	n	na	y	n	n	NA	micro-reconstruction	No claim regarding sequence:	na	4	syllable	chain
47	Wuxi	Zhang 2014	Sinitic	Wuxi TX4: low rise fall > low rise	low rising-falling	merger	n	y	y	maybe	n	na	n	n	40	generational differences with rigorous statistical analysis				syllable	Yang & Xu (2019)
47	Wuxi	Zhang 2014	Sinitic	Wuxi TX4: low rise > low fall rise	low rising	merger	n	y	maybe	maybe	n	na	n	n	40	generational differences with rigorous statistical analysis				syllable	Yang & Xu (2019)
48	Xi'an	Zhang 2009	Sinitic	1b 24 > 34	low rising	one of multiple, not claimed to form a chain	n	maybe	y	y	n	na	n	n	47	generational differences, lacking rigorous statistical analysis				syllable	Yang & Xu (2019)
48	Xi'an	Zhang 2009	Sinitic	2ab 51>52	high falling	one of multiple, not claimed to form a chain	n	maybe	y	n	n	na	n	n	47	generational differences, lacking rigorous statistical analysis				syllable	Yang & Xu (2019)
49	Xiaoshuijing Miao	Yang 2016	Hmong-Mien	T1: 52 > 51	high falling	one of multiple, not claimed to form a chain	n	n	n	n	n	na	n	high falling offset lowers (!)	36	generational differences, lacking rigorous statistical analysis				syllable	Yang & Xu (2019)
49	Xiaoshuijing Miao	Yang 2016	Hmong-Mien	T2: 13 > 23	low rising	one of multiple, not claimed to form a chain	n	maybe	y	y	n	na	n	n	36	generational differences, lacking rigorous statistical analysis				syllable	Yang & Xu (2019)
49	Xiaoshuijing Miao	Yang 2016	Hmong-Mien	mid level becomes higher overall to mid-high level (affects T4, T5, T7)	mid level	one of multiple, not claimed to form a chain	n	n	n	n	na	n	n	overall raising of mid (!)	36	generational differences, lacking rigorous statistical analysis				syllable	Yang & Xu (2019)
49	Xiaoshuijing Miao	Yang 2016	Hmong-Mien	T8 21 > 31	low falling	one of multiple, not claimed to form a chain	n	n	n	y	n	na	n	n	36	generational differences, lacking rigorous statistical analysis				syllable	Yang & Xu (2019)
50	Xinghua	Zhang & Zhu 2014	Sinitic	3a and 4a 66 falsetto merge to 55 high modal*	high level falsetto	merger	n	n	n	n	na	y	n	n	7	generational differences, lacking rigorous statistical analysis				syllable	Yang & Xu (2019)
51	Yangliu Lalo	Yang et al. 2018	Tibeto-Burman	high rise-fall becomes mid-high level	high rising-falling	simple shift	n	n	y	n	n	na	n	n	63	generational differences with rigorous statistical analysis				syllable	Yang & Xu (2019)
52	Yueyang	He 2007	Sinitic	1a 44 > 33	midhigh level	one of multiple, not claimed to form a chain	n	n	n	n	na	y	n	n	32	generational differences, lacking rigorous statistical analysis				syllable	Yang & Xu (2019)
52	Yueyang	He 2007	Sinitic	3ab 31 > 51	mid falling	one of multiple, not claimed to form a chain	n	n	n	n	y	na	n	n	32	generational differences, lacking rigorous statistical analysis				syllable	Yang & Xu (2019)
52	Yueyang	He 2007	Sinitic	2b 33 > 21/vd_	mid level	one of multiple, not claimed to form a chain	n	n	n	n	na	n	lowered after voiced	n	32	generational differences, lacking rigorous statistical analysis				syllable	Yang & Xu (2019)
53	Zhaoyuan	Qi 2011	Sinitic	1a 323 > 2ab 33	low falling-rising	merger	n	maybe	y	n	n	na	n	n	6	generational differences, lacking rigorous statistical analysis				syllable	Yang & Xu (2019)
53	Zhaoyuan	Qi 2011	Sinitic	3a 212 partial merge to 3b 52*	low falling-rising	merger	n	y	n	y	y	na	n	n	6	generational differences, lacking rigorous statistical analysis				syllable	Yang & Xu (2019)
54	Dongguan Cantonese	Liang 2018	Sinitic	Yinping (T1) low rise-fall > low rise in traditional lexical items and > high level in newer + more frequent lexical items (an effect of contact with Standard Mandarin)	low rising-falling	contact-induced	n	n	n	n	n	na	raising to high level due to borrowing	n	16	generational differences with rigorous statistical analysis				syllable	non-chain shift
54	Dongguan Cantonese	Liang 2018	Sinitic	Yinping (T1) low rise-fall > low rise in traditional lexical items and > high level in newer + more frequent lexical items (an effect of contact with Standard Mandarin)	low rising-falling	simple shift	n	y	y	n	n	na	n	n	16	generational differences with rigorous statistical analysis				syllable	non-chain shift
55	Hanoi Vietnamese	Brunelle & Kirby (forthcoming)	AustroAsiatic	B1 (sắc) mid rising lowers and rise excursion reduce	mid rising	chain shift?	n	y	y	n	y	na	n	n	NA	comparing acoustic results from different time periods				syllable	non-chain shift
55	Hanoi Vietnamese	Brunelle & Kirby (forthcoming)	AustroAsiatic	C1 (hỏi) falling-rising > falling, loss of final rise	low falling-rising	chain shift?	n	y	y	maybe	n	na	n	n	NA	comparing acoustic results from different time periods				syllable	non-chain shift
56	Lahu Na	Yang et al. 2022	Tibeto-Burman	T11 onset raises becoming low falling	low level	one of multiple, not claimed to form a chain	n	n	n	y	na	n	n	n	33	generational differences with rigorous statistical analysis				syllable	non-chain shift
56	Lahu Na	Yang et al. 2022	Tibeto-Burman	T21 onset raises becoming mid falling	low falling	one of multiple, not claimed to form a chain	n	n	n	y	n	na	n	n	33	generational differences with rigorous statistical analysis				syllable	non-chain shift
57	Limi	Zhou 2020	Tibeto-Burman	T24 low rising onset raises and offset lowers, heading toward merger with T33 mid level	low rising	merger	n	maybe	y	y	n	na	n	n	15	generational differences with rigorous statistical analysis				syllable	non-chain shift
58	Macau Cantonese	Zhang 2019	Sinitic	T2 25 > 23 offset lowers, moving toward merger with T5 23*; *; T6 low level raises overall, moving toward merger with T3 mid level*	mid rising	merger	n	n	y	n	n	na	n	n	50	generational differences with rigorous statistical analysis				syllable	non-chain shift
59	Qiepu Hani	Qu 2020	Tibeto-Burman	T2 high falling offset raises	high falling	one of multiple, not claimed to form a chain	n	maybe	y	n	n	na	n	n	33	generational differences with rigorous statistical analysis				syllable	non-chain shift
60	Yoloxóchitl Mixtec	DiCanio, Benn & Castillo García 2021	Otomanguean	tonal melody 4.13: the low rising surfaces as low level even in final position	low rising	simple shift	n	maybe	y	maybe	n	na	n	n	6	experimental phonetic				root	non-chain shift
61	Songkhla Southern Thai	Phonyarit 2015	Kradai	T1 midhigh-rising-falling to midhigh-rising	midhigh rising-falling	one of multiple, not claimed to form a chain	n	y	y	maybe	n	na	n	n	72	generational differences, lacking rigorous statistical analysis				syllable	non-chain shift
61	Songkhla Southern Thai	Phonyarit 2015	Kradai	T2 mid rising-falling to mid-rising	mid rising-falling	one of multiple, not claimed to form a chain	n	y	y	maybe	n	na	n	n	72	generational differences, lacking rigorous statistical analysis				syllable	non-chain shift
61	Songkhla Southern Thai	Phonyarit 2015	Kradai	T3 mid-falling to either mid-rising-falling or mid-level-falling	mid-falling	one of multiple, not claimed to form a chain	n	y	y	n	n	na	n	n	72	generational differences, lacking rigorous statistical analysis				syllable	non-chain shift
61	Songkhla Southern Thai	Phonyarit 2015	Kradai	T4 mid-low level to mid-low falling	low level	one of multiple, not claimed to form a chain	n	n	n	y	na	n	n	n	72	generational differences, lacking rigorous statistical analysis				syllable	non-chain shift
61	Songkhla Southern Thai	Phonyarit 2015	Kradai	T5 mid-high-level to mid-high falling	midhigh level	one of multiple, not claimed to form a chain	n	n	n	n	n	n	n	midhigh level offset lowers (!)	72	generational differences, lacking rigorous statistical analysis				syllable	non-chain shift
61	Songkhla Southern Thai	Phonyarit 2015	Kradai	T6 mid-level to mid-level-falling	mid level	one of multiple, not claimed to form a chain	n	maybe	n	n	n	n	n	mid level to falling (!), but this may actually be falling-rising > falling	72	generational differences, lacking rigorous statistical analysis				syllable	non-chain shift
62	Songkhla Southern Thai 2	Wongrukhavet and Sudhinont (2022)	Kradai	T1 midhigh rising-falling shifting to midlow falling	midhigh rising-falling	merger	n	y	y	maybe	n	na	merger	n	30	generational differences, lacking rigorous statistical analysis				syllable	non-chain shift
62	Songkhla Southern Thai 2	Wongrukhavet and Sudhinont (2022)	Kradai	T6 midlow falling-rising to mid-low falling	midlow falling-rising	one of multiple, not claimed to form a chain	n	y	y	maybe	n	na	n	n	30	generational differences, lacking rigorous statistical analysis				syllable	non-chain shift
63	Nam Pua Lao	Akharawatthanakun (2020)	Kradai	T1 high falling-rising to mid rising	high falling-rising	one of multiple, not claimed to form a chain	n	n	n	y	n	na	n	n	15	generational differences, lacking rigorous statistical analysis				syllable	non-chain shift
63	Nam Pua Lao	Akharawatthanakun (2020)	Kradai	T2 low rising-falling to low rising	low rising-falling	one of multiple, not claimed to form a chain	n	y	maybe	maybe	n	na	n	n	15	generational differences, lacking rigorous statistical analysis				syllable	non-chain shift
64	Luang Nuea Lue	Akharawatthanakun (2018)	Kradai	T2 mid falling to high falling	mid falling	one of multiple, not claimed to form a chain	n	n	n	n	y	na	n	n	6	generational differences, lacking rigorous statistical analysis				syllable	non-chain shift
65	Mae Sai Lue	Teeranon (2010)	Kradai	T1 mid rising to mid level	mid rising	one of multiple, not claimed to form a chain	n	maybe	y	n	y	na	n	n	6	generational differences, lacking rigorous statistical analysis				syllable	non-chain shift
65	Mae Sai Lue	Teeranon (2010)	Kradai	T2 high level to high rising	high level	one of multiple, not claimed to form a chain	n	maybe	n	y	na	n	n	n	6	generational differences, lacking rigorous statistical analysis				syllable	non-chain shift
65	Mae Sai Lue	Teeranon (2010)	Kradai	T3 mid falling to mid level	mid falling	one of multiple, not claimed to form a chain	n	maybe	y	n	n	na	n	n	6	generational differences, lacking rigorous statistical analysis				syllable	non-chain shift
65	Mae Sai Lue	Teeranon (2010)	Kradai	T6 mid falling-rising to mid level	mid falling-rising	one of multiple, not claimed to form a chain	n	maybe	y	n	n	na	n	n	6	generational differences, lacking rigorous statistical analysis				syllable	non-chain shift
66	Thai Song Dam (Phetchaburi Black Tai)	Saeng-Ngam (2006)	Kradai	T1, mid rising to low rising	mid rising	chain shift?	maybe	n	n	n	y	na	n	n	60	generational differences, lacking rigorous statistical analysis				syllable	non-chain shift
66	Thai Song Dam (Phetchaburi Black Tai)	Saeng-Ngam (2006)	Kradai	T3, low rising to mid-falling-rising	low rising	chain shift?	maybe	y	n	y	maybe	na	n	n	60	generational differences, lacking rigorous statistical analysis				syllable	non-chain shift
66	Thai Song Dam (Phetchaburi Black Tai)	Burusphat (2013)	Kradai	T4, mid/low level to mid-falling, may be due to contact with Standard Thai.	mid level	one of multiple, not claimed to form a chain	n	n	n	y	na	n	contact	n	24	generational differences, lacking rigorous statistical analysis				syllable	non-chain shift
66	Thai Song Dam (Phetchaburi Black Tai)	Saeng-Ngam (2006)	Kradai	T5, low level to mid-falling and high-falling	low level	one of multiple, not claimed to form a chain	n	n	n	y	na	n	n	n	60	generational differences, lacking rigorous statistical analysis				syllable	non-chain shift

## Sheet: References
Source
Akharawatthanakun, Phinnarat. 2010. Phonological variation in Phuan. Manusya 13(2). 50–87.
Akharawatthanakun, Phinnarat. 2018. Tone systems and tone variation in Lue (Luang Nuea). In Proceedings of Payap Research Symposium 2018, 754–770. Chiang Mai: Payap University. https://symposiumpyu.payap.ac.th/pyu/uploads/userfiles/file/symposiumpyu/proceedings/2018/Proceeding_PYU_Symposium_2018.pdf.
Akharawatthanakun, Phinnarat. 2020. Tone system and tone variation & change in Lao (Nam Pua). Vannavidas 20(1). 1–36. https://doi.org/10.14456/vannavidas.2020.1.
Arnold, Laura. in press. The diachrony of word prosody in the Maˈya-Salawati languages of Raja Ampat. Oceanic Linguistics.
Bei, Xianming贝先明. 2011. 苏州话阴阳调类的分组统计差异 [The difference of statistical analysis between Yin tones and Yang tones in Suzhou dialect]. 湖州职业技术学院学报[Journal of Huzhou Vocational and Technological College], 2011(2). 44–48.
Benn, Joshua. 2021. The phonetics, phonology, and historical development of Guienagati Zapotec. Buffalo, NY: State University of New York at Buffalo Ph.D. dissertation.
Brunelle, Marc & James Kirby. forthcoming. Tonogenesis and the evolution of tone systems.
Burusphat, Somsonge. 2011. Variation in Thai Song Dam. Paper presented at the 21st Southeast Asian Linguistics Society (SEALS), Bangkok, May 11-13.
Burusphat, Somsonge. 2013. Tonal variation and change of Tai Dam. Journal of Language and Culture (JLC) 32(2). 19–41.
Chen, Xiao. 2018. Qing zhonghouqi zhi Minguo chuqi Beijing hua de shengdiao bianhua (清中后期至民国初期北京话的声调变化) [Tone change in Beijing dialect from mid-late Qing to early Republic]. Zhongguo Yuwen 2018(04). 435–445.
Chiung, Wi-Vun Taiffalo. 2003. Tone change in Taiwaneseː Age and geographic factors. University of Pennsylvania Working Papers in Linguistics 8(1). 43–55.
Cui, Jie. 2010. Variation in Nanchang Gan. University of Pittsburgh MA thesis.
DiCanio, Christian, Joshua Benn & Rey Castillo García. 2021. Disentangling the effects of position and utterance-level declination on the production of complex tones in Yoloxóchitl Mixtec. Language and Speech 64(3). 515–557. https://doi.org/10.1177/0023830920939132.
Endo, Mitsuaki. 2020. Bidirectional change in tone: Evidence from Chinese. Economic Review 12. 1–29.
Gao, Yujuan高玉娟. 2018. 大连方言阴平调变异的社会语言学分析 [Sociolinguistic variation of Tone 1 in Dalian dialect]. 辽宁师范大学学报（社会科学版）[辽宁师范大学学报（社会科学版）[Journal of Liaoning Normal University (Social Science Edition)]. 41(5). 86–93.
Ge, Chunyu, Wenwei Xu, Wentao Gu & Peggy Pik Ki Mok. 2023. The change in breathy voice after tone split: A production study of Suzhou Wu Chinese. Journal of Phonetics 98. 101239. https://doi.org/10.1016/j.wocn.2023.101239.
Gong, Lu龚露. 2018. 七百弄布努语声调的实验研究 [Qibainong Bunu tone experimental research]. Kunming: Yunnan Normal University MA thesis.
He, Wei何薇. 2007. 湖南省新派岳阳市方言语音及其社会变异研究 [The phonetic study and social changing of the new Yueyang dialect in Hunan Province]. Changsha: Hunan Normal University MA thesis.
Hing, Jia Wen. 2018. Tonal variation and contour change: Internally driven or contact-induced? Paper presented at the 5th New Ways of Analyzing Variation Asia-Pacific (NWAV-AP), Brisbane, Feb 2-4.
Hu, Zhidan 胡智丹. 2007. 无锡方言语音的共时差异与历时演变 [A study on the synchronic differences and historical evolution of Wuxi dialect phonetics]. Suzhou: Suzhou University MA thesis.
Kenstowicz, Michael J. & Mengwei Yu. 2022. Split of the Middle Chinese falling (qù) tone in Èzhōu (Húběi) Mandarin. Journal of the Phonetic Society of Japan 26. 27–42.
Li, Jindai 李金黛. 2010. 都匀话老中青三代的语音差异 [Phonetic differences in Duyun dialect spoken by the old, the middle-aged, and the youth]. 贵阳学院学报(社会科学版) [Journal of Guiyang University (Social Science Quarterly)] 2010(3). 62–66.
Liang, Lei & Xiaolin Meng. 2011. A sociophonetic study on tones of Chongqing Mandarin in gender and age difference. In Wai-Sum Lee & Eric Zee (eds.), 17th International Conference on Phonetic Sciences (ICPhS XVII), 1230–1233. Hong Kong: City University of Hong Kong.
Liang, Yuan. 2018. Merger and transfer: Tone variation and change of Dongguan Cantonese. Lingua 208. 19–30. https://doi.org/10.1016/j.lingua.2018.03.003.
Liu, Lili刘俐李. 2013a. 江阴吴语近二十年的变化[The changes of Wu dialect in Jiangyin in the last 20 years]. 语言研究 [Studies in Language and Linguistics] 33(1). 60-67.
Liu, Lili刘俐李. 2013b. 东干语(陕西支)声调共时差异实验研究 [Experimental research on synchronic tone variation in Dong’gan (Shaanxi Branch)]. 民族语文 [Minority languages of China] 2013(5). 65-76.
Liu, Mengzhe 刘梦喆. 2017. 山东济阳阴平调调值变异研究 [Shandong Jiyang yinping tone value variation research]. Beijing: Beijing Language and Culture University MA thesis.
L-Thongkum, Theraphan. 1997. Tone change and language contact: A case study of Mien-Yao and Thai. In A.S. Abramson (ed.), Southeast Asian Linguistics Studies In Honor of Vichin Panupong, 153–160. Bangkok: Chulalongkorn University Press.
Ming, Maoxiu明茂修 & Xiancheng Zhang张显成. 2015. 试论汉语方言的调值格局及其演变机制 [The patterns and evolution mechanism of tone value of Chinese dialects]. 西南大学学报（社会科学版）[Journal of Southwest University (Social Sciences Edition)] 41(4). 145-192.
Mok, Peggy Pik-Ki & Peggy Wai-Yi Wong. 2010. Production of the merging tones in Hong Kong Cantonese: Preliminary data on monosyllables. Speech Prosody 2010 100986, 1–4, http://speechprosody2010.illinois.edu/papers/100986.pdf. (4 May 2017.)
Mok, Peggy Pik-Ki, Donghui Zuo & Peggy Wai-Yi Wong. 2013. Production and perception of a sound change in progress: Tone merging in Hong Kong Cantonese. Language Variation and Change 25(3). 341–370. doi:10.1017/S0954394513000161.
Ou, Jinghua. 2012. Tone merger in Guangzhou Cantonese. Hong Kong: Hong Kong Polytechnic University MA thesis.
Owen, R. Wyn. 2012. A tonal analysis of contemporary Tai Khuen varieties. Journal of the Southeast Asian Linguistics Society (JSEALS) 5. 12–31.
Phonyarit, Ratchadaporn. 2015. Tonal variation in the Southern Thai dialect of Songkhla by age group and region. Bangkok: Mahidol University MA thesis. http://mulinet11.li.mahidol.ac.th/e-thesis/2558/504/5636459.pdf.
Pittayaporn, Pittayawat. 2007. Directionality of tone change. In Juergen Trouvain & William J. Barry (eds.), 16th International Congress of Phonetic Sciences (ICPhS XVI), 1421–1424. Saarbrücken, Germany: Saarland University.
Pittayaporn, Pittayawat. 2018. Phonetic and systemic biases in tonal contour changes in Bangkok Thai. In Haruo Kubozono & Mikio Giriko (eds.), Tonal change and neutralization (Phonology and Phonetics), vol. 27, 249–278. Berlin: Mouton de Gruyter.
Qi, Haifeng亓海峰. 2011. 招远方言声调格局的变异[On tone pattern changes in Zhaoyuan dialect]. 汉语学报 [Chinese Linguistics] 2011(34). 36-42.
Qu, Zhousuo. 2020. Honghe Qiepu shengdiao tedian ji shiyan fenxi (红河切普声调特点及实验分析)[Experimental analysis in Qiepu Hani of Honghe County]. Kunming: Yunnan Normal University MA thesis.
Remijsen, Bert. 2001a. Dialectal variation in the lexical tone system of Maˈya. Language and Speech 44(4). 473–499.
Remijsen, Bert. 2001b. Word-prosodic systems of Raja Ampat languages (LOT 49). Utrecht, Netherlands: LOT.
Saeng-Ngam, Suntharat. 2006. Lexical and tonal variation by age group and language attitude in the Song language (Black Tai) of Khao Yoy district, Phetchaburi province. Bangkok: Chulalongkorn University MA thesis. https://cuir.car.chula.ac.th/bitstream/123456789/15290/1/suntharat.pdf.
Sanders, Robert. 2008. Tonetic sound change in Taiwan Mandarin: The case of Tone 2 and Tone 3 citation contours. In Marjorie K.M. Chan & Hana Kang (eds.), Proceedings of the 20th North American Conference on Chinese Linguistics (NACCL-20), vol. 1, 87–107. Columbus, Ohio: The Ohio State University.
Shi, Feng石锋 & Ping Wang王萍. 2006. A statistical analysis of tone groups in Beijing Mandarin [北京话单字音声调的分组统计分析]. Contemporary Linguistics [当代语言学] 8(4). 324–333.
Teeranon, Phanintra. 2007. The change of Standard Thai high tone: An acoustic study and a perceptual experiment. SKASE Journal of Theoretical Linguistics 4(3). 1–16.
Teeranon, Phanintra. 2010. The change of lexicons and tones in Chiangrai Tai Lue by age group and ease of transportation. Chiang Rai: Mae Fah Luang University MA thesis. https://archives.mfu.ac.th/database/items/show/1795.
Thepboriruk, Kanjan. 2009. Bangkok Thai tones revisited. Journal of the Southeast Asian Linguistics Society (JSEALS) 3(1). 86–105.
Wang, Yufeng王宇枫. 2004. 方村莫话六十年音变[60 years of sound change in Fangcun village dialect of Mak]. 民族语文 [Minority languages of China] 2004(5). 35-39.
Wang, Yufeng王宇枫. 2006. 从内蒙古集宁方言新老两派声调系统的变异看声调的演变[Examining tonal evolution through the tone system variation of new and old Jining dialect of Inner Mongolia]. 中国语文 [Studies of the Chinese language] 2006(1). 41-44.
Wei, Wei魏伟 & Cao Wen曹文. 2010. 太仆寺旗方言声调调值及入声和去声的语音演变[Tone values of Taipusi dialect and sound change in the ru and qu tones]. Paper presented at the第九届中国语音学学术会议 [Ninth Phonetics Conference in China (PCC) 2010], Tianjin, May 28-30.
Wongrukhave, Pavaret & Jomkwan Sudhinont. 2022. Gaan bprae kŏng rá-bòp sĭiang wan-ná-yúk paa-săa tai tìn dtâi jang-wàt pát-tá-lung dtaam bpàt-jai taang săng-kom dâan aa-yú (การแปรของระบบเสียงวรรณยุกต์ภาษาไทยถิ่นใต้จังหวัดพัทลุงตามปัจจัยทางสังคมด้านอายุ) [Variations and tonal systems of Southern Thai dialect of Phatthalung Province according to the sociological factor of age]. Waa-rá-săan sà-hà wí…
Xiang, Ning向柠 & Feng Shi石锋. 2007. 长沙话单字调的声学实验与统计分析 [Experimental and statistical analysis of tones in Changsha dialect]. 语言研究 [Studies in Language and Linguistics] 27(2). 53-58.
Xing, Wuzhou邢五洲. 2008. 巢湖方言单字调实验研究 [Experimental analysis of citation tones of Chaohu dialect]. Nanjing: Nanjing Normal University MA thesis.
Xue, Yimeng薛一萌. 2013. 八里罕方言岛声调变异调查研究 [Tonal variation in Balihan dialect island]. Beijing: Minzu University of China MA thesis.
Yang, Cathryn, James N. Stanford & Zhengyu Yang. 2015. A sociotonetic study of Lalo tone split in progress. Asia-Pacific Language Variation and Change 1(1). 52–77.
Yang, Cathryn, James N. Stanford, Chunxia Luo & Naluo Zhang. 2022. Generational differences in the low tones of Black Lahu. Linguistics Vanguard 8(s5). 759–770. https://doi.org/10.1515/lingvan-2021-0099.
Yang, Cathryn, James N. Stanford, Yang Liu, Jinjing Jiang & Liufang Tang. 2019. Variation in the tonal space of Yangliu Lalo, an endangered language of Yunnan, China. Linguistics of the Tibeto-Burman Area 42(1). 2–37.
Yang, Cathryn. 2022. The phonetic tone change *high > rising: Evidence from the Ngwi dialect laboratory. Diachronica 39(2). 226–267. https://doi.org/10.1075/dia.19062.yan.
Yang, Qiyuan杨棋媛. 2016. 小水井苗语声调实验研究 [Experimental analysis of Xiaoshuijing Miao tone]. Kunming: Yunnan Minzu University MA thesis.
Yang, Wenjing & Cathryn Yang. 2018. Reduction in Dali Nisu tone change-in-progress. Tonal Aspects of Languages 6, 46–50. Berlin, June 18-20.
Yeh, Chia-Hsin & Jung-Yueh Tu. 2012. The effect of language attrition and tone sandhi on Taiwanese tonal processing. Paper presented at the Sixth International Conference of Speech Prosody, Shanghai, May 22-25.
Yeh, Chia-Hsin & Yen-Hwei Lin. 2015. Tonal change induced by language attrition and phonetic similarity in Hai-lu Hakka. In Elisabeth Delais-Roussarie, Mathieu Avanzi & Sophie Herment (eds.), Prosody and Language in Contact: L2 Acquisition, attrition and languages in multilingual situations, 189–220. Berlin: Springer.
Yi, Li衣莉. 2016. 正在进行中的声调演化——兰州单字调 [Tone change-in-progress—Lanzhou citation tones]. Paper presented at the 49th International Conference on Sino-Tibetan Languages and Linguistics, Guangzhou, November 11-13.
Zeng, Xiaoyu曾晓渝. 2001. 高田壮语的声调演变 [Tone change in Gaotian Zhuang]. 民族语文[Minority Languages of China] 2001(4). 1-8.
Zeng, Xiaoyu曾晓渝. 2005. 从年龄差异看现代荔波音变成因 [On the cause of phonetic change of different ages in Libo dialect]. 语言科学 [Linguistic Science] 4(4). 11-21.
Zhang, Guanyu 张冠宇. 2012. 兰州话单字音声调格局的统计分析 [Statistical analysis of Lanzhou citation tone patterns]. 现代语文(语言研究版) [Modern Chinese (Language Research)] 2012(3). 12–18.
Zhang, Jingfen. 2020. Tono-types and tone evolution: The case of Chaoshan (Frontiers in Chinese Linguistics). Singapore: Springer Singapore.
Zhang, Jingwei, Yanhong Zhang & Daming Xu. 2018. A new tone merger in Hong Kong Cantonese. Paper presented at the 5th New Ways of Analyzing Variation Asia-Pacific (NWAV-AP), Brisbane, Feb. 2-4.
Zhang, Jingwei. 2019. Tone mergers in Cantonese: Evidence from Hong Kong, Macao, and Zhuhai. Asia-Pacific Language Variation 5(1). 28–49.
Zhang, Jingwei张璟玮. 2014. A sociophonetic study on tonal variation of the Wúxī and Shànghǎi dialects. Utrecht: LOT.
Zhang, Jingyu张锦玉. 2009. 西安话单字音声调的分组统计分析[The group-divided statistical analysis of monosyllabic tone of Xi’an dialect]. 咸阳师范学院学报 [Journal of Xianyang Normal University] 41(2). 80-84.
Zhang, Yi张祎. 2015. 南城方音变异研究 [Sound variation in Nancheng dialect]. Nanchang: Jiangxi Normal University MA thesis.
Zhou, Tiantian. 2020. Shengdiao yanbian leixingxue shijiaoxia de Fengqing Limi Yiyu zhongsheng 24 diao de pinghua (声调演变类型学视角下的凤庆俐侎 彝语中升24 调的平化) [The transformation of 24 tone in Limi of Yi language]. Journal of Qiannan Normal University for Nationalities 40(2). 66–73.
Zhu, Xiaonong朱晓农, Mingying Wei韦名应 & Junfang Wang王俊芳. 2016. 十五调和气调：侗语榕江县口寨方言案例 [Fifteen tones and aspirated tone: Case study of the Dong dialect of Kouzhai village of Rongjiang County]. 民族语文 [Minority languages of China] 2016(5). 12-24.
Zhu, Xiaonong朱晓农, Qing Lin林晴 & Pachaya趴差桠. 2015. 泰语声调的类型和顺时针链移[Thai tone typology and the clockwise tonal chain shift]. 民族语文[Minority languages of China] 2015(4). 3-18.
Zsiga, Elizabeth. 2008. Modeling diachronic change in the Thai tonal space. University of Pennsylvania Working Papers in Linguistics 14(1). 395–408.
Yi, Li, Han Li, Yingyi Li & Juejue Mu. 2024. An ongoing tonal-pattern change: Lanzhou dialect. Journal of Chinese Linguistics 52(2). 336–361.
Yang, Cathryn, Jennifer Engelkemier & Tatsuro Daniel Arisawa. 2024. Iu Mien tone change in real time: A re-study of L-Thongkum (1988). Journal of the Southeast Asian Linguistics Society 17(1). 63–80.

## Sheet: Redundant studies
Language(s)	Study	Language Family	Reported change(s)	Sample size	Study Type
Iu Mien	Yang et al. 2024	Hmong-Mien	T3 high rising-falling > mid rising	40	generational differences with rigorous statistical analysis
Iu Mien	Yang et al. 2024	Hmong-Mien	T4 low rising-falling > low rising, resulting in ongoing merger with T5 low rising*	40	generational differences with rigorous statistical analysis
Hong Kong Cantonese	Mok & Wong 2010	Sinitic	T2 25 & T5 23 bidirectional merger	17	generational differences with rigorous statistical analysis
Lanzhou Mandarin	Yi 2024	Sinitic	1a high falling > high level	36	generational differences with rigorous statistical analysis
Lanzhou Mandarin	Yi 2024	Sinitic	merger of 2ab and 3ab*	36	generational differences with rigorous statistical analysis
Lanzhou Mandarin	Yi 2017	Sinitic	merger of 2ab and 3ab*	34	generational differences with rigorous statistical analysis
Wuxi	Hu 2007	Sinitic	2ab 223 > 213	40	generational differences, lacking rigorous statistical analysis
Bangkok Thai	Thepboriruk 2009	Kra-Dai	Bangkok Thai Falling T3 offset raises	25	generational differences, lacking rigorous statistical analysis
Changsha	Zhou 2013	Sinitic	same as Xiang & Shi 2007	5	generational differences, lacking rigorous statistical analysis
Suzhou Wu	Bei 2011	Sinitic	1b 113 > 213	57	generational differences, lacking rigorous statistical analysis
These studies have the same findings as previous studies. They are placed here rather than in the database
